# Supplementary material for: Nanoscale ZnO/CdS heterostructures with engineered interfaces for high photocatalytic activity under solar radiation
Source: Royal Society of Chemistry journal article supplement (doi:10.1039/c0jm03116j), 2011-01-01
Supplement: c0jm03116j.pdf [file c0jm03116j.pdf]

# Supporting Information

## Nanoscale ZnO/CdS Heterostructures with Engineered Interfaces for High Photocatalytic Activity under Solar Radiation

*Paromita Kundu<sup>1</sup>, Parag A. Deshpande<sup>2</sup>, Giridhar Madras<sup>2</sup> and N. Ravishankar<sup>1</sup>*

<sup>1</sup>Materials Research Centre, Indian Institute of Science, Bangalore 560012, India

<sup>2</sup>Department of Chemical Engineering, Indian Institute of Science, Bangalore 560012, India

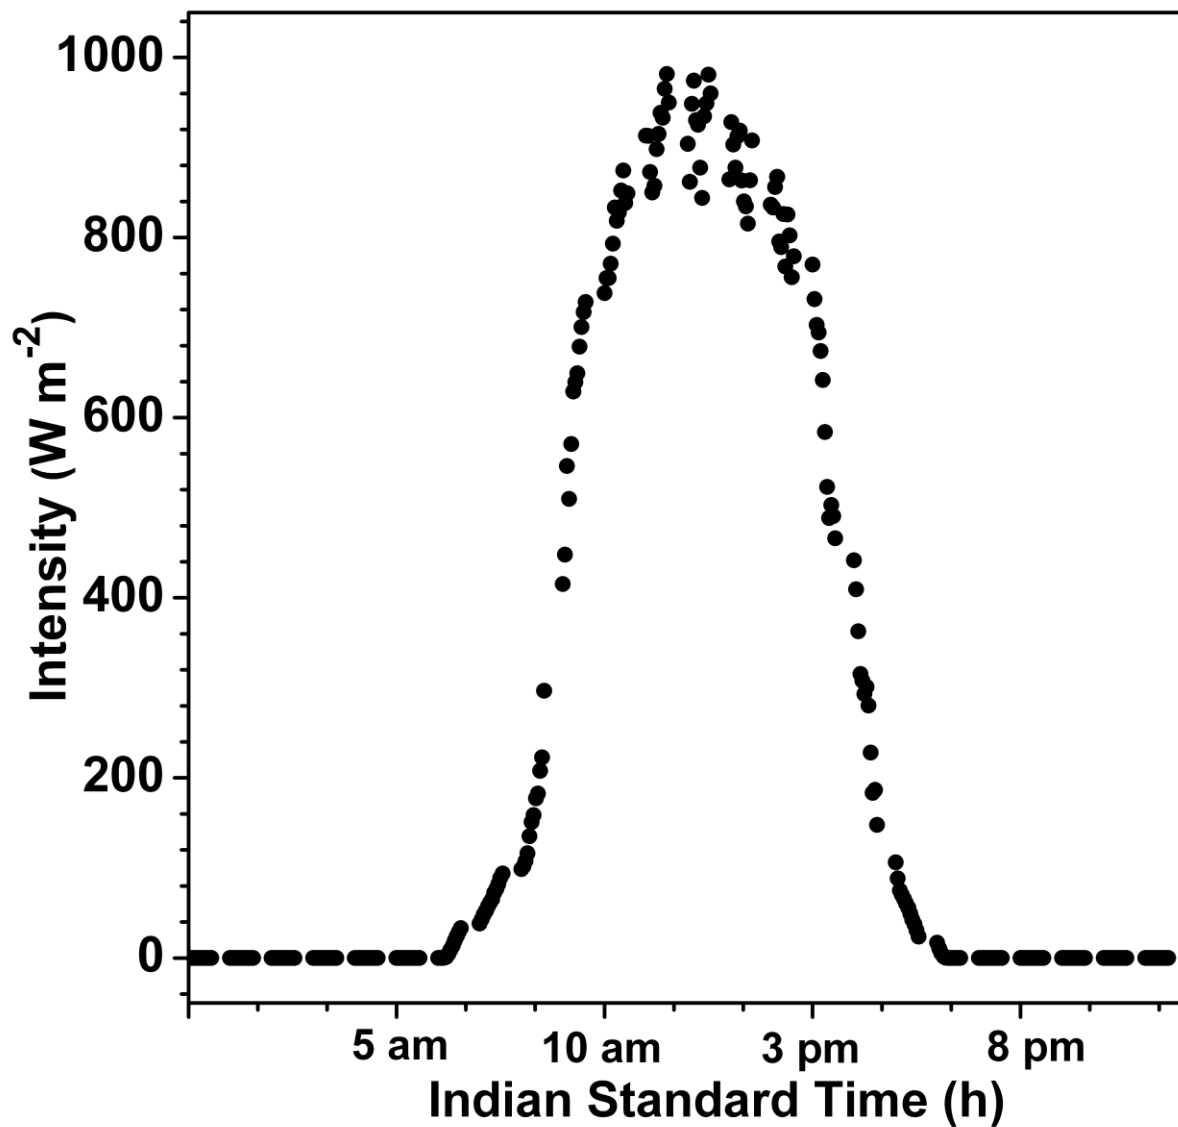

Figure S1: Variation of the average solar intensity during the different periods of the day from April 01 to April 12, 2010.

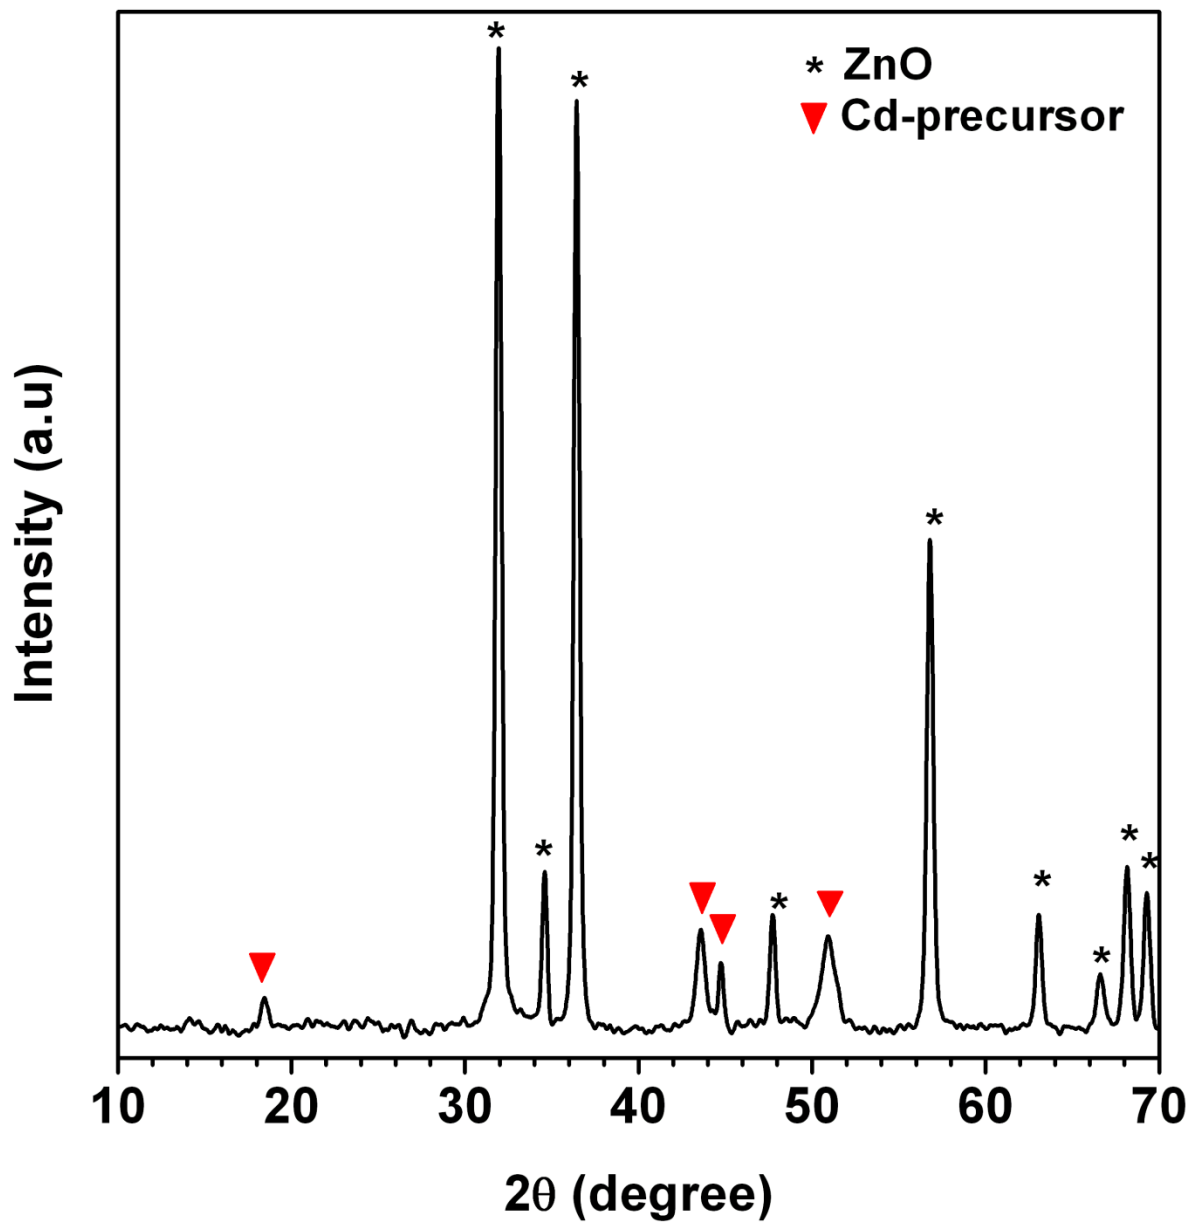

Figure S2. XRD pattern obtained from the Cd-precursor coated ZnO before sulfidation.

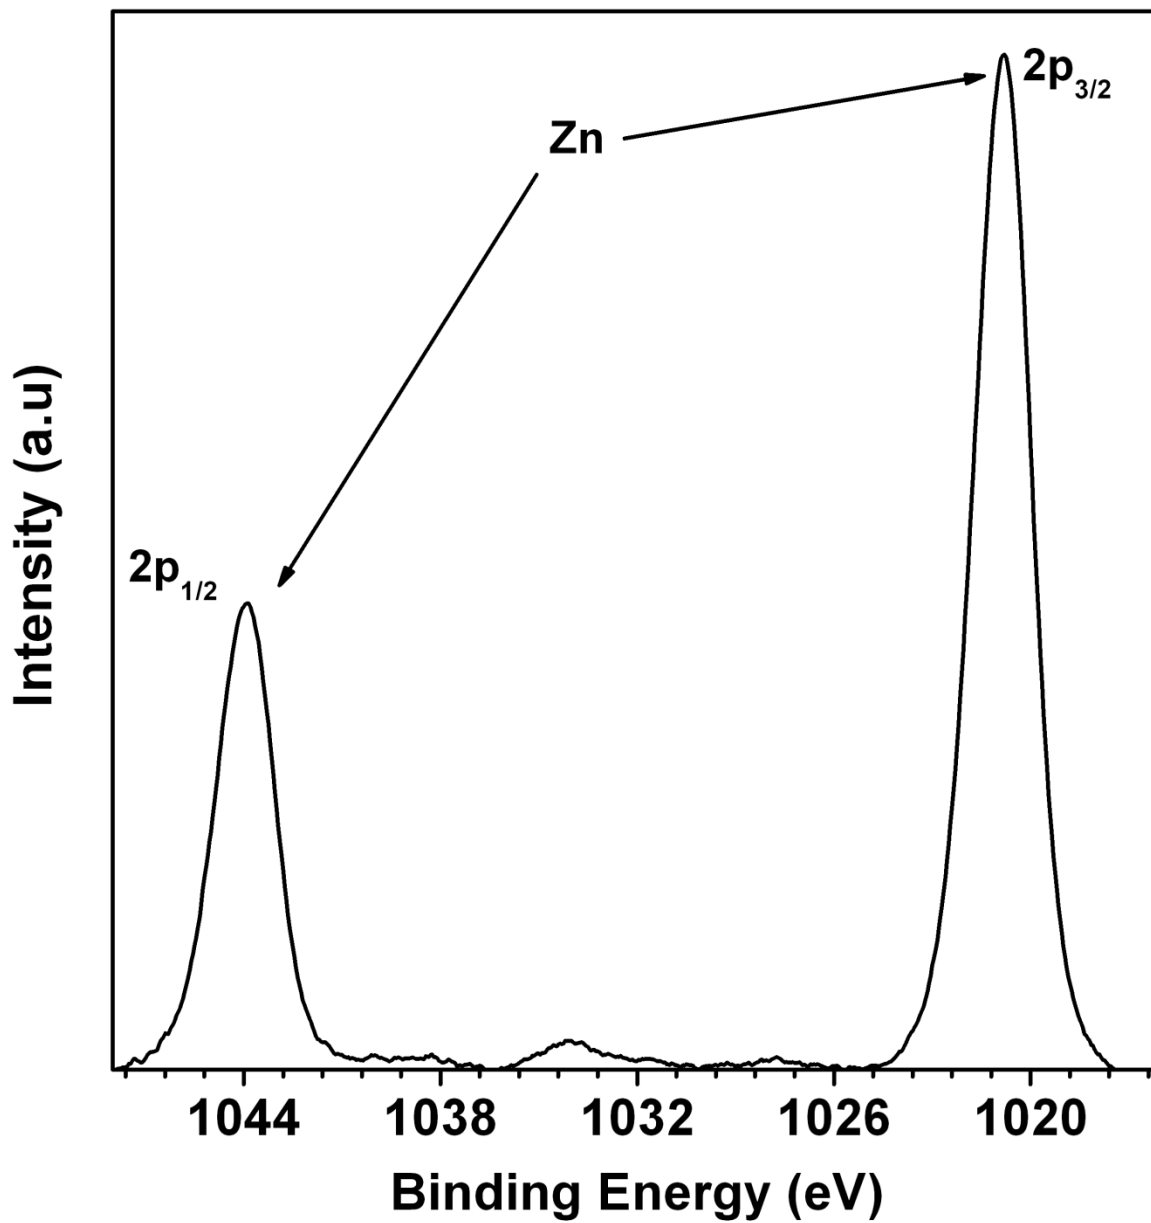

Figure S3. XPS core-level spectra of Zn<sub>2p</sub> in ZnO nanorods.

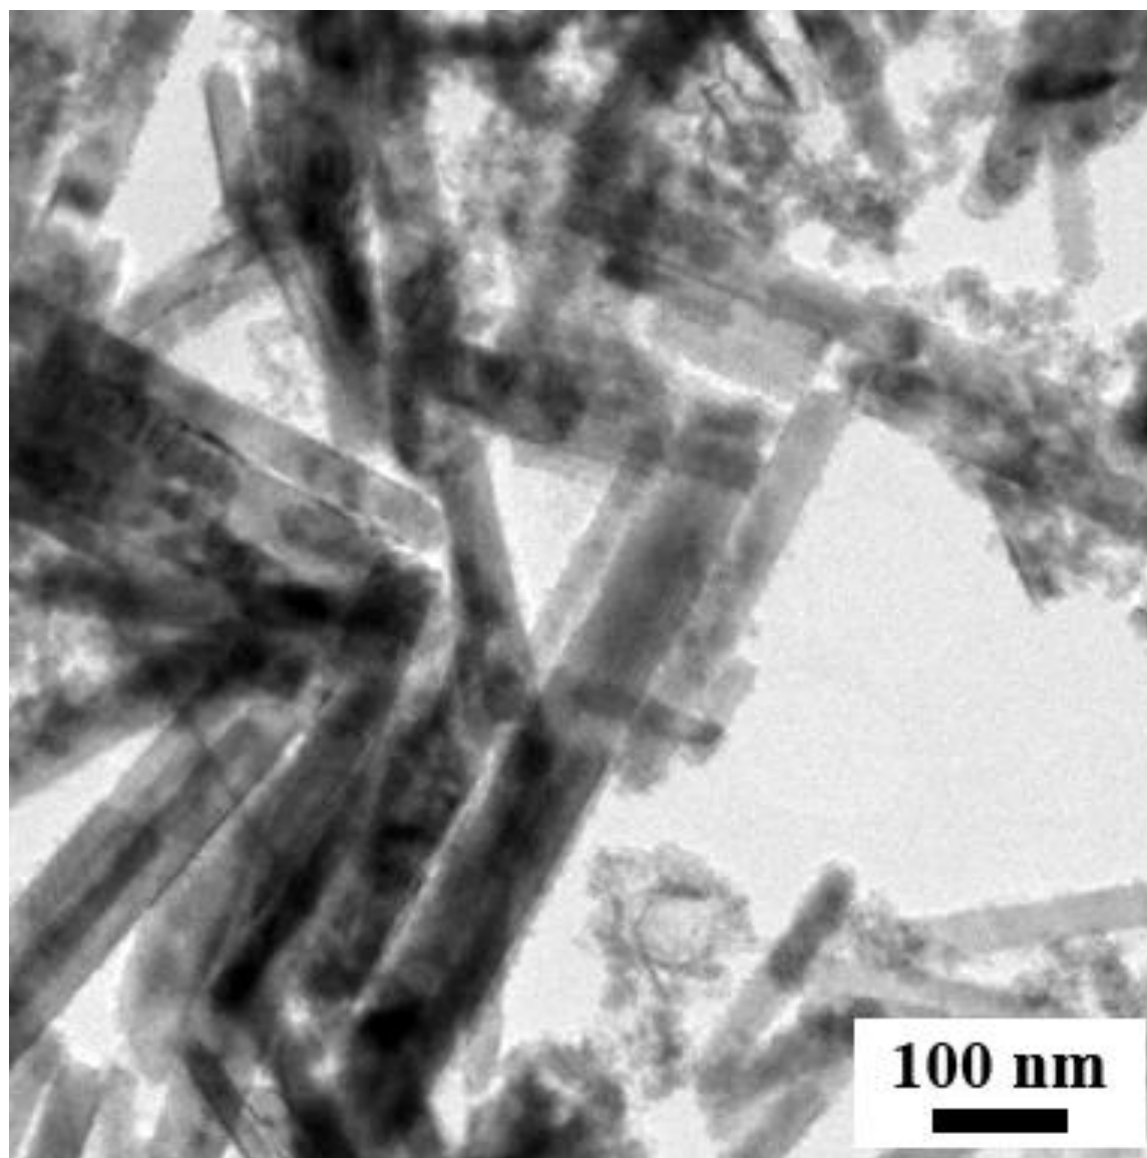

Figure S4. Bright Field TEM image of ZnO-CdS nanohybrid, ZC-3, showing fine particle clusters of CdS attached to ZnO nanorods.

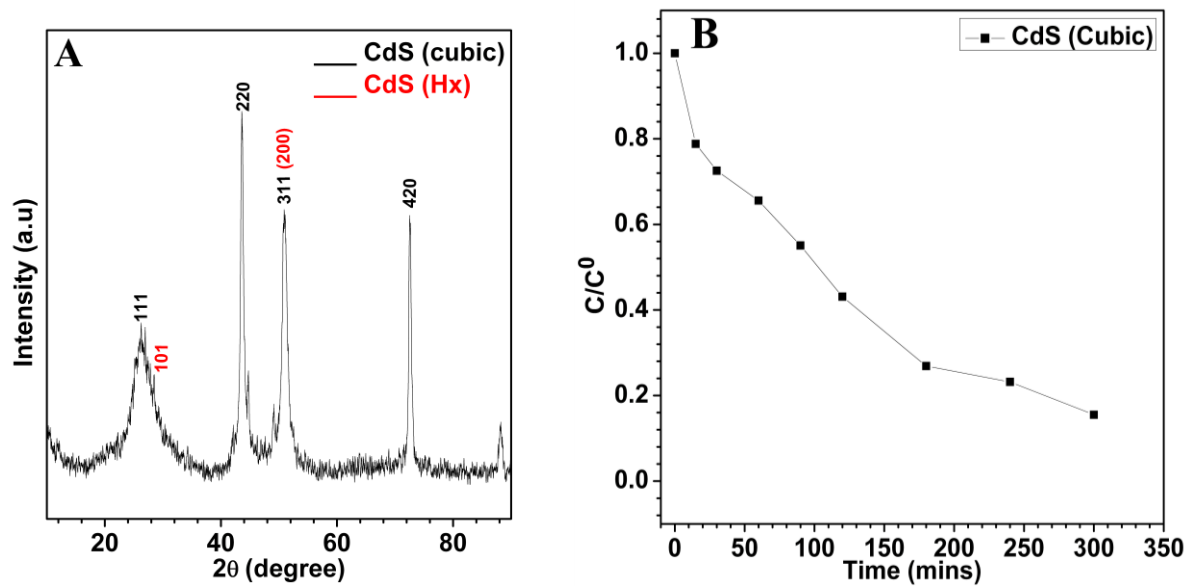

Figure S5. (A) XRD pattern of the CdS synthesized by precipitation method using same conditions as ZC-3 and heated to 150 °C for 30 mins and (B) degradation rate of methylene blue (MB) under solar radiation in presence of CdS (cubic phase + hexagonal phase), which is similar to ZC-3.
